# Supplementary material for: Suppression of Mic60 compromises mitochondrial transcription and oxidative phosphorylation
Source: PubMed Central journal article supplement (PMC4303897; doi:10.1038/srep07990), 2015-01-23
Supplement: srep07990-s1.pdf [file srep07990-s1.pdf]

Supplementary information for

## **Suppression of Mic60 compromises mitochondrial transcription and oxidative phosphorylation**

Rui-Feng Yang<sup>1#</sup>, Li-Hong Sun<sup>1#</sup>, Ran Zhang<sup>1#</sup>, Yuan Zhang<sup>1</sup>, Yu-Xuan Luo<sup>1</sup>, Wei Zheng<sup>1</sup>,  
Zhu-Qin Zhang<sup>1</sup>, Hou-Zao Chen<sup>1</sup> & De-Pei Liu<sup>1\*</sup>

<sup>1</sup> State Key Laboratory of Medical Molecular Biology, Department of Biochemistry and Molecular Biology, Institute of Basic Medical Sciences, Chinese Academy of Medical Sciences & Peking Union Medical College, Beijing 100005, P.R. China

\* Correspondence and requests for materials should be addressed to D.P.L. (liudp@pumc.edu.cn)

<sup>#</sup> These authors contributed equally to this work

**Supplementary Figure S1.**

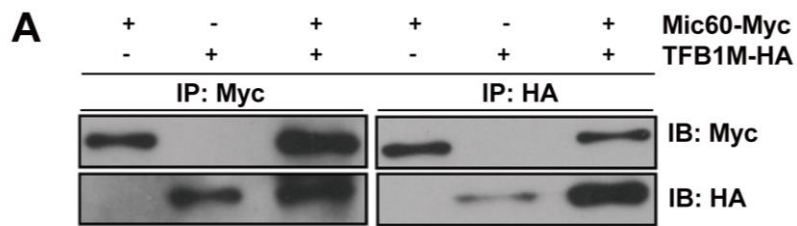

**Supplementary Figure S1. Mic60 interacts with TFB1M.** (A) Co-immunoprecipitation (IP) of Mic60 and TFB1M in cell lysates using antibodies specific for the c-Myc tag or the HA tag. Cell lysates were obtained from HEK293T cells transfected with Mic60-Myc and TFB1M-HA. Input, 10%. Immunoblotting assays were performed after IP.

Supplementary Figure S2.

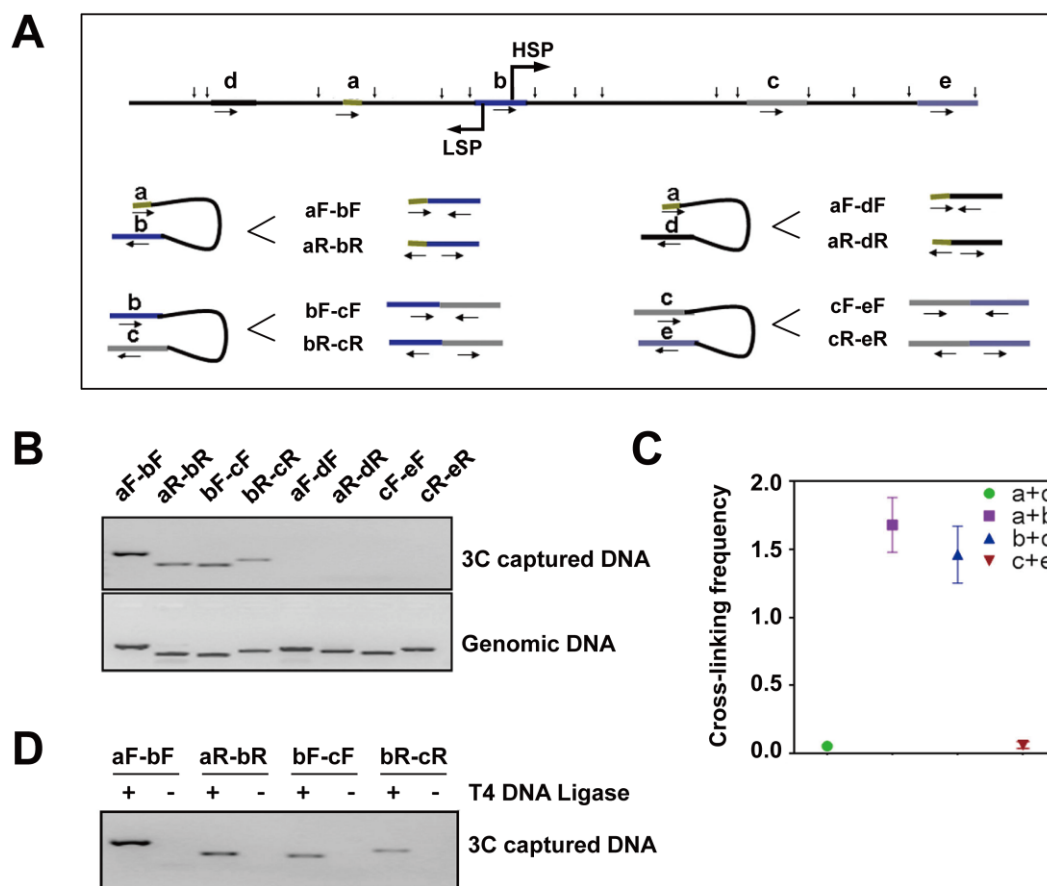

**Supplementary Figure S2. A higher-order mtDNA structure detected by 3C assay using *CviA* II digested fragments.** (A) Schematic representation of 3C design and proposed ligation fragment. *CviA* II restriction endonuclease sites are depicted by arrows above the sequence. The primer sets used in the *CviA* II-digested samples are shown, with F representing the forward direction of DNA and R representing the reverse direction. DNA was digested and intermolecularly ligated for use as a positive control. (B) 3C analysis of *CviA* II-digested samples. As described in Methods, mtDNA-protein complexes were digested by *CviA* II and ligated, and the ligated DNA were eluted for PCR analysis. PCR products were generated with primer pairs aF-bF, aR-bR, bF-cF and bR-cR. (C) Cross-linking frequency determination of *CviA* II-digested samples by 3C assays. Cross-linking frequencies were determined in triplicate, and means and SEM are plotted for every primer pair. (D) 3C analysis of *CviA* II-digested samples. PCR products were obtained between a-b and b-c ligated fragments in the presence of DNA ligase. Unligated samples were used as negative controls.

**Supplementary Table S1.** RT-PCR primers for real-time PCR.

| Gene        | Species | Forward primer sequence   | Reverse primer sequence             |
|-------------|---------|---------------------------|-------------------------------------|
| COXI        | Mouse   | TTGGAGGCTTTGGAAACTGAC     | GAGAAGGAGAAATGATGGTGGTAG            |
| COXII       | Mouse   | TGCTCTGAAATTTGTGGATCTAACC | TTTTTTTTTTTTTTTTTTTTTTTAAATTAA<br>A |
| COXIII      | Mouse   | GAAACCACATAAATCAAGCCCTAC  | TGAAGAATGTAGAACCATAGATACC           |
| Cyto b      | Mouse   | CCAAATCTCCACGGTCTGTTC     | CTCTCCCCAGGTGATGCCT                 |
| ND1         | Mouse   | AGTTCCCCTACCAATACCACACC   | GGAGTTTGAGGCTCATCCTGATC             |
| ND2         | Mouse   | CATAGGGGCATGAGGAGGACT     | TGAGTAGAGTGAGGGATGGGTTG             |
| ND4         | Mouse   | CCTCACATCATCACTCCTATTCTG  | GGCTATAAGTGGGAAGACCATTG             |
| ND5         | Mouse   | GCCTGATAATAGTGACGCTAGGA   | CTATGAATGATTGAGCCAGAGCAT            |
| COXIV       | Human   | CATGTGGCAGAAGCACTATGTGT   | GGTTCACCTTCATGTCCAGCA               |
| Cyto c      | Human   | GTGCCAGCGACTAAAAGAGAAT    | AGTCTTGTGCTTGCCTCCCTT               |
| SDH         | Human   | CTGGAGATCCGAGAAGGAAGAG    | AGCGAAGATCATGGCTGTCTC               |
| 12S<br>rRNA | Human   | CACTACGAGCCACAGCTTAA      | TCAGGGTTTGCTGAAGATGG                |
| 16S<br>rRNA | Human   | GGCATGCTCATAAGGAAAGG      | GGCCGTTAAACATGTGTCAC                |
| COXI        | Human   | GATTTTTTCGGTCACCCTGAAG    | CTCAGACCATACCTATGTATC               |
| COXII       | Human   | CTATCCTGCCCGCCATCATC      | GATTAGTCCGCCGTAGTCGG                |
| COXIII      | Human   | CACATCCGTATTACTCGCATC     | GAAGTACTCTGAGGCTTGTAG               |
| Cyto b      | Human   | CAAAC TAGGAGGCGTCCCTTG    | CTGGTTGTCTCCGATTCAG                 |
| ND1         | Human   | CCTAGGCCTCCTATTTATTC      | GAATGATGGCTAGGGTGAC                 |
| ND2         | Human   | CTACGCCTAATCTACTCCAC      | CTTTGAAGGCTCTTGGTCTG                |
| ND4         | Human   | GGACTCCACTTATGACTCCC      | GGTTGAGAATGAGTGTGAGGC               |
| ND5         | Human   | CTATCACC ACTCTGTTCGCAG    | GTGGTTGGTTGATGCCGATTG               |
| ND6         | Human   | CTAAAACACTACCAAGACC       | GGAATGATGGTTGTCTTTGG                |
| Mitofilin   | Human   | GGGTACAAGAACAGGAATTGAAGT  | AGAAACGGGCTCTAAGGGTCTC              |
| GAPDH       | Human   | TGTGGGCATCAATGGATTTGG     | ACACCATGTATTCCGGGTCAAT              |

**Supplementary Table S2.** PCR primers for 3C assays.

| Primer | Primer sequences            |
|--------|-----------------------------|
| aF     | TGTGGGGGGTGTCTTTGG          |
| aR     | CCACAGCACTTAAACACATCTCTG    |
| bF     | GGGAGGGGGTTTTGATGTG         |
| bR     | GTACCATAAATACTTGACCACCTGTAG |
| cF     | GCGTGAAGGTAGCGGATGA         |
| cR     | ACTTTATTGACTCCTAGCCGCAG     |
| dF     | AACTCACTGGAACGGGGATG        |
| dR     | GACCTGGCGGTGCTTCATATC       |
| eF     | GCGAGAATAATGATGTATGCTTTG    |
| eR     | AACAGAAACAAAGCATAATCATTATTC |
| a1F    | AAAAAAGTAAAAGGAACTCGGCAAAC  |
| a1R    | CGGAGATGTTGGATGGGGTG        |
| a2F    | GGATAATGCCGATGTTTCAGGTT     |
| a2R    | ACACAGCAAGACGAGAAGACCCT     |
| a3F    | GCCAAGGAGTGAGCCGAAGTT       |
| a3R    | AGCCTGCGTCAGATCAAAACACT     |
| a4F    | CCTACAAACAACCTAACCTGCCACT   |
| a4R    | TCTTCTATGATAGGGGAAGTAGCGT   |
